# Supplementary material
Source: Springer Nature journal article supplement (https://www.springermedizin.de/resource/supplementary/12935_2006_147_MOESM3_ESM.pdf/9541184)

# MEF-10(1)

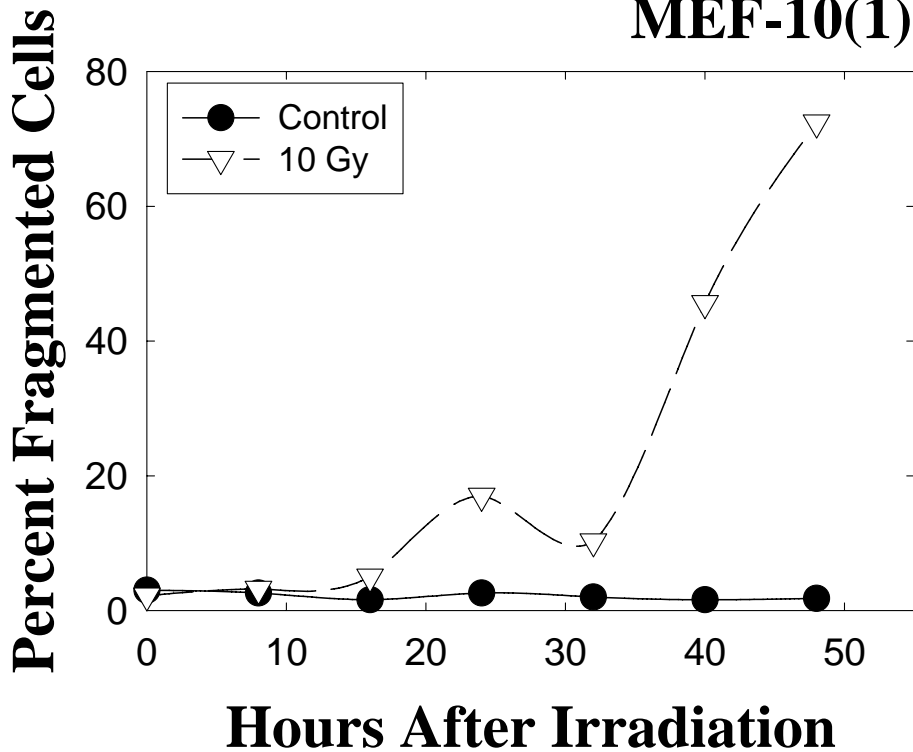

Supplement: MOESM3 [file 9541184]
